# Supplementary material
Source: Springer Nature journal article supplement (https://www.springermedizin.de/resource/supplementary/12961_2014_339_MOESM10_ESM.pdf/9571076)

**A**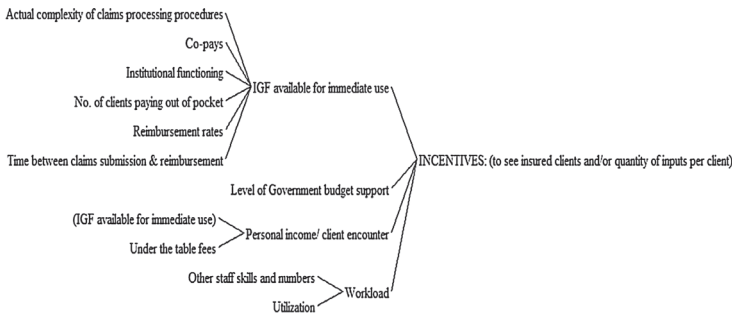**B**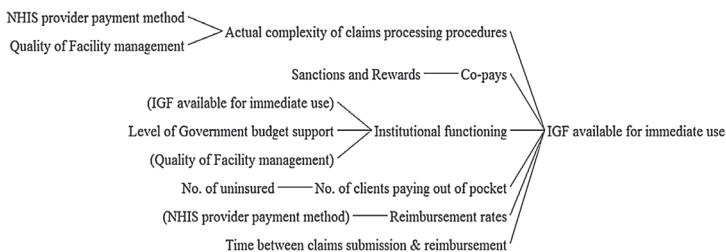**C**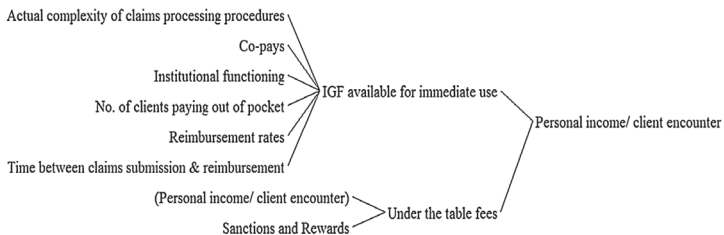**D**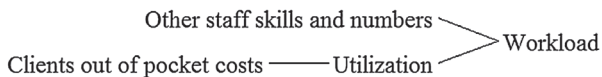**E**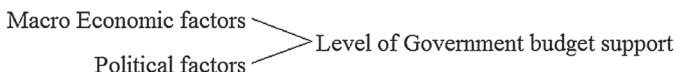

Supplement: MOESM10 [file 9571076]
